# Supplementary material for: Comparative Genomics of Clinical and Environmental Isolates of Vibrio spp. of Colombia: Implications of Traits Associated with Virulence and Resistance
Source: MDPI journal article supplement (doi:10.3390/pathogens10121605), 2021-12-09
Supplement: s1 [file s1]

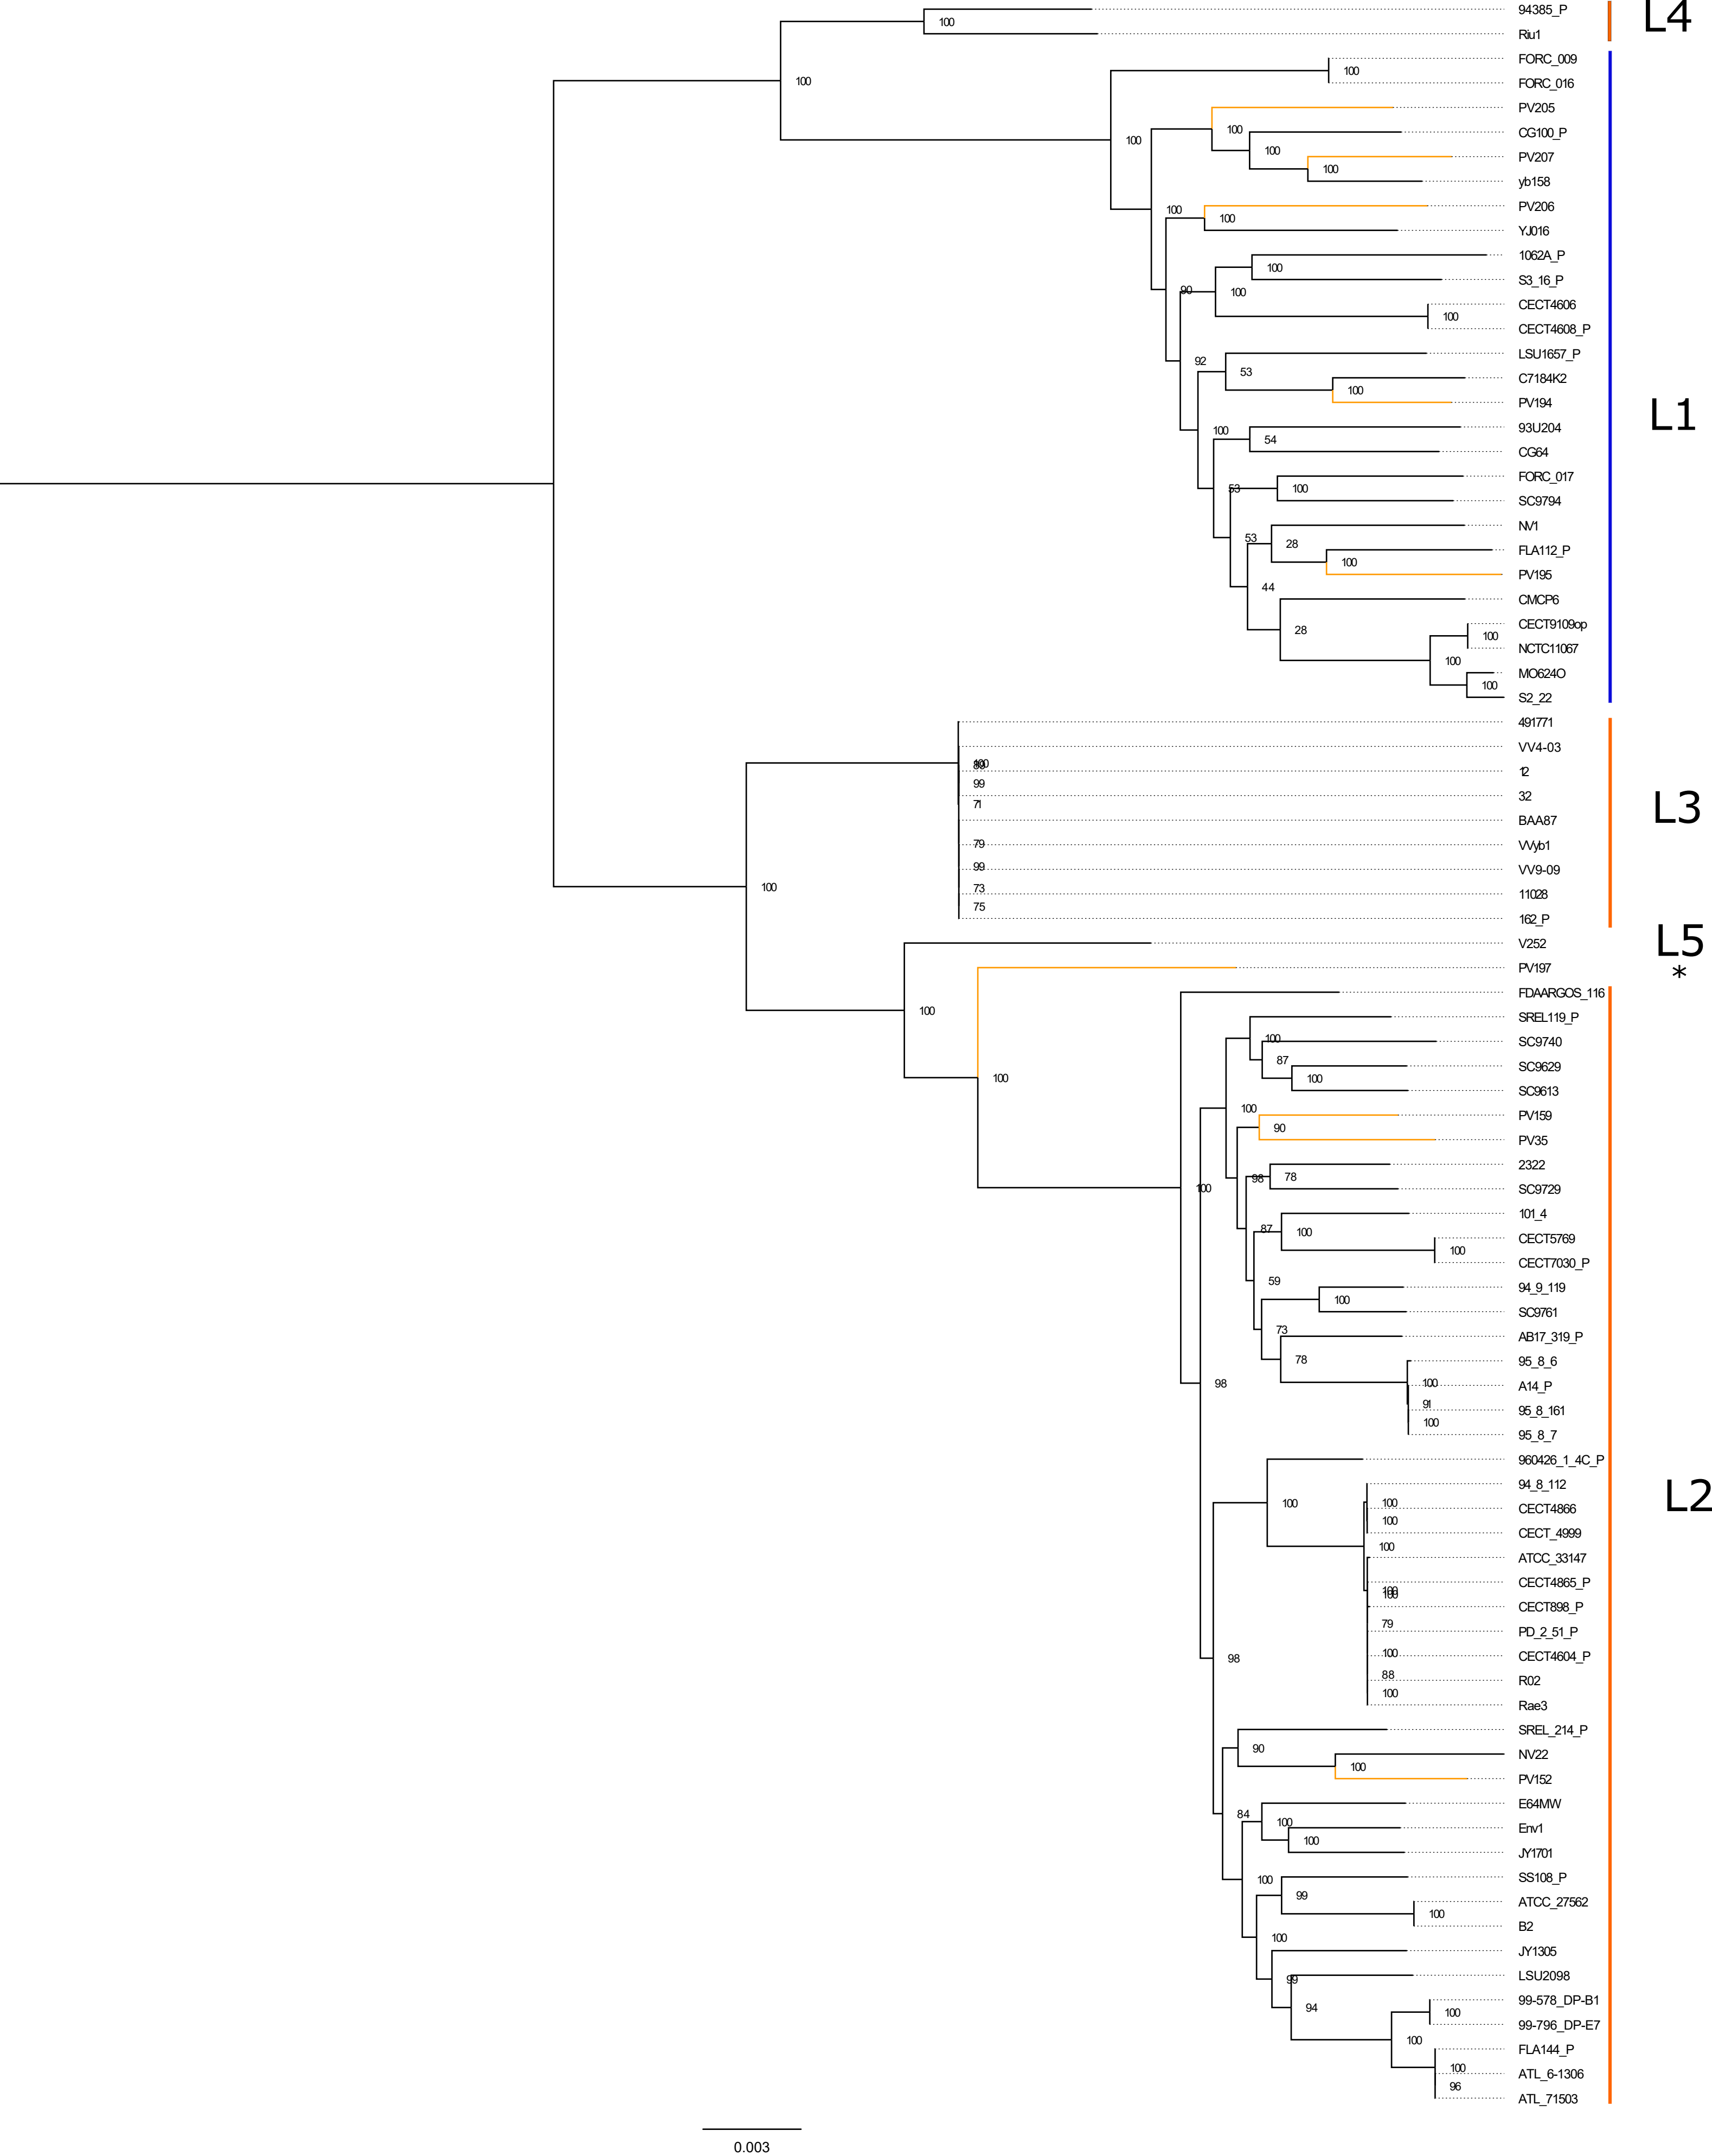

**Figure S1.** Maximum likelihood tree of 80 *V. vulnificus* isolates. BS are based on 1000 replicates. The nine isolates of the present study are marked with orange.

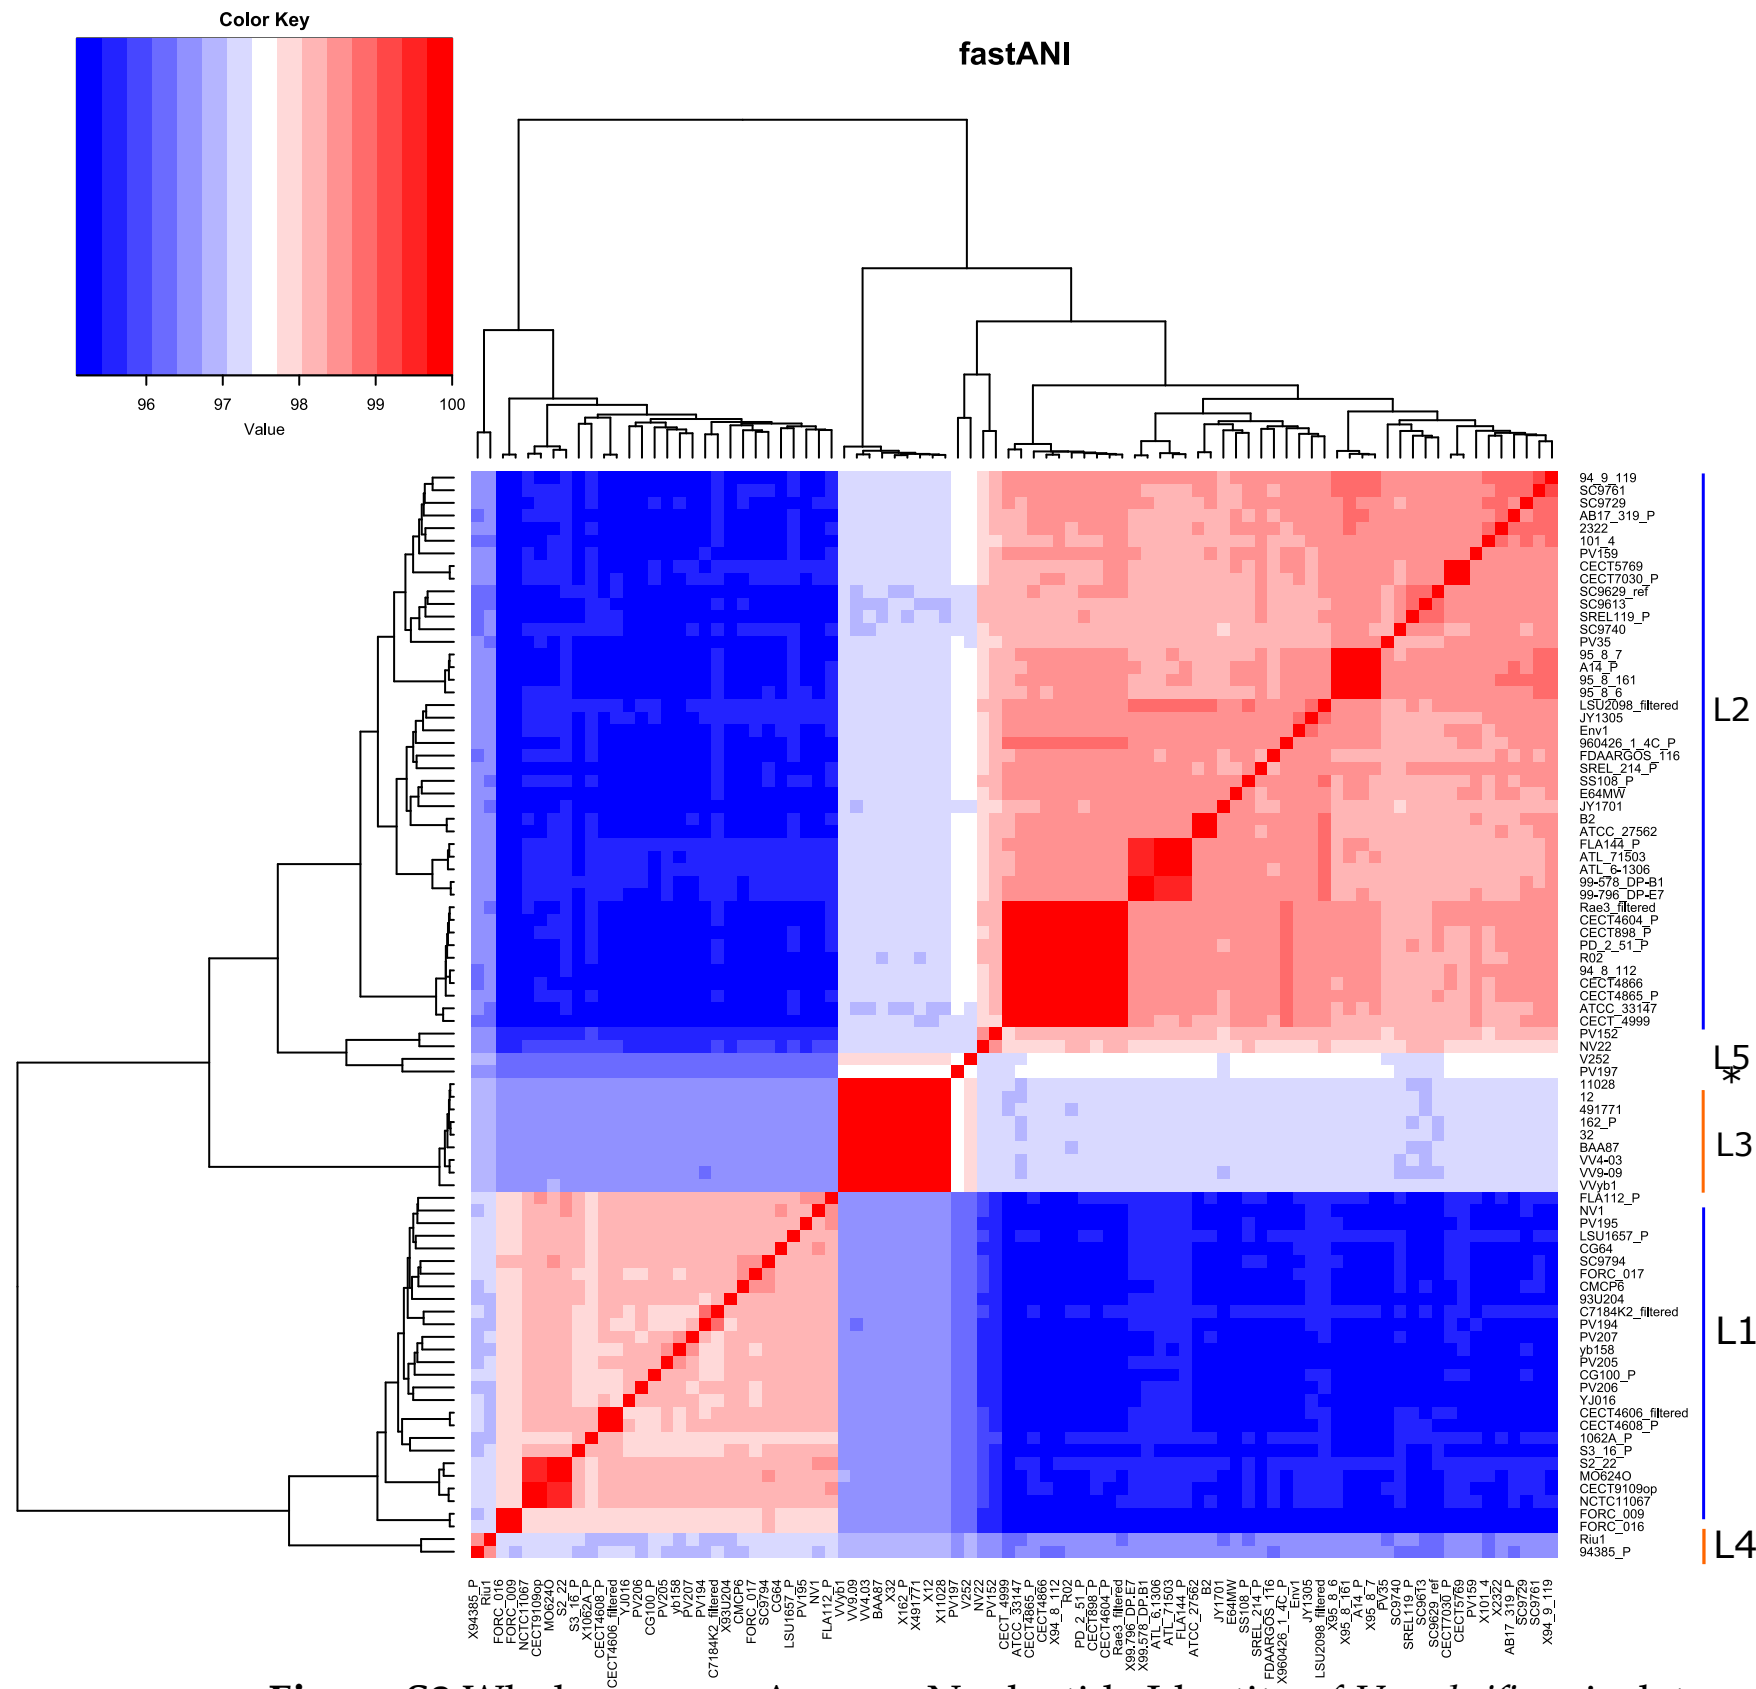

**Figure S2.** Whole-genome Average Nucleotide Identity of *V. vulnificus* isolates
