# Supplementary material for: Comparative Genomics of Clinical and Environmental Isolates of Vibrio spp. of Colombia: Implications of Traits Associated with Virulence and Resistance
Source: MDPI journal article supplement (doi:10.3390/pathogens10121605), 2021-12-09
Supplement: s1 [file s1]

Supplementary Table S1. Characteristics of the obtained assemblies of the six *Vibrio* species analyzed in this study. The characteristics represent statistics and metrics resulted from the quality control, preprocessing, assembly and annotation processes.

| <i>Vibrio</i> species      | Isolate ID | Assembly features |           |                |          |                               |      |
|----------------------------|------------|-------------------|-----------|----------------|----------|-------------------------------|------|
|                            |            | Total lenght (bp) | Scaffolds | GC content (%) | N50 (bp) | Reference genome coverage (%) | CDS  |
| <i>V. parahaemolyticus</i> | PV1        | 5128845           | 48        | 45.23          | 401170   | 91.99                         | 4615 |
| <i>V. parahaemolyticus</i> | PV11       | 5036579           | 82        | 45.37          | 164783   | 90.22                         | 4569 |
| <i>V. parahaemolyticus</i> | PV17       | 5002236           | 67        | 45.44          | 359608   | 88.79                         | 4515 |
| <i>V. parahaemolyticus</i> | PV32       | 5051964           | 82        | 45.34          | 199318   | 89.26                         | 4594 |
| <i>V. parahaemolyticus</i> | PV53       | 5133150           | 54        | 45.21          | 427167   | 97.47                         | 4595 |
| <i>V. parahaemolyticus</i> | PV85       | 5146837           | 48        | 45.3           | 426983   | 97.54                         | 4635 |
| <i>V. parahaemolyticus</i> | PV109      | 5276965           | 394       | 45.49          | 169396   | 87.51                         | 5009 |
| <i>V. parahaemolyticus</i> | PV112      | 5495767           | 270       | 45.47          | 171457   | 88.91                         | 5041 |
| <i>V. parahaemolyticus</i> | PV156      | 4997431           | 90        | 45.33          | 172955   | 87.41                         | 4562 |
| <i>V. parahaemolyticus</i> | PV161      | 5055780           | 127       | 45.31          | 138236   | 87.75                         | 4638 |
| <i>V. parahaemolyticus</i> | PV170      | 5266539           | 310       | 45.48          | 426973   | 97.47                         | 4881 |
| <i>V. parahaemolyticus</i> | PV173      | 5406329           | 537       | 45.63          | 384835   | 97.4                          | 4982 |
| <i>V. parahaemolyticus</i> | PV213      | 5247732           | 127       | 45.24          | 167072   | 89.5                          | 4799 |
| <i>V. parahaemolyticus</i> | PV221      | 5053872           | 97        | 45.3           | 162813   | 87.83                         | 4626 |
| <i>V. parahaemolyticus</i> | PV235      | 5059799           | 133       | 45.43          | 209984   | 88.61                         | 4638 |
| <i>V. parahaemolyticus</i> | PV278      | 5103966           | 45        | 45.25          | 564561   | 97.4                          | 4573 |
| <i>V. parahaemolyticus</i> | PV280      | 5144753           | 42        | 45.31          | 442827   | 97.52                         | 4642 |
| <i>V. fluvialis</i>        | PV3        | 4786892           | 91        | 50.03          | 193060   | 89.57                         | 4480 |
| <i>V. fluvialis</i>        | PV4        | 4648859           | 63        | 50.07          | 248249   | 89.28                         | 4323 |
| <i>V. fluvialis</i>        | PV5        | 4648576           | 60        | 50.1           | 202241   | 89.04                         | 4352 |

|                         |       |         |     |       |        |       |      |
|-------------------------|-------|---------|-----|-------|--------|-------|------|
| <i>V. fluvialis</i>     | PV7   | 4715369 | 59  | 50.02 | 185239 | 89.25 | 4403 |
| <i>V. fluvialis</i>     | PV8   | 4649633 | 69  | 50.1  | 201884 | 89.05 | 4345 |
| <i>V. fluvialis</i>     | PV9   | 4633335 | 63  | 50.15 | 174774 | 89.59 | 4280 |
| <i>V. fluvialis</i>     | PV47  | 4758672 | 54  | 50.02 | 214306 | 88.22 | 4466 |
| <i>V. fluvialis</i>     | PV50  | 4674347 | 62  | 50    | 189585 | 91.68 | 4334 |
| <i>V. fluvialis</i>     | PV59  | 4723217 | 47  | 50.1  | 410476 | 89.67 | 4418 |
| <i>V. fluvialis</i>     | PV60  | 4808719 | 61  | 49.95 | 181182 | 91.4  | 4490 |
| <i>V. fluvialis</i>     | PV75  | 4827992 | 90  | 49.87 | 145719 | 90.23 | 4506 |
| <i>V. fluvialis</i>     | PV76  | 5029615 | 238 | 49.89 | 117824 | 90.99 | 4843 |
| <i>V. fluvialis</i>     | PV92  | 4674008 | 57  | 50.14 | 251845 | 89.96 | 4338 |
| <i>V. fluvialis</i>     | PV101 | 4679663 | 77  | 50.11 | 209951 | 89.31 | 4417 |
| <i>V. fluvialis</i>     | PV105 | 4739424 | 168 | 50.15 | 268904 | 89.8  | 4560 |
| <i>V. fluvialis</i>     | PV131 | 4841678 | 111 | 50.04 | 146095 | 91.14 | 4503 |
| <i>V. alginolyticus</i> | PV82  | 5077839 | 85  | 44.67 | 206900 | 91.4  | 4564 |
| <i>V. alginolyticus</i> | PV116 | 5246251 | 241 | 44.85 | 303610 | 94.19 | 4877 |
| <i>V. alginolyticus</i> | PV118 | 5129110 | 81  | 44.61 | 210035 | 94.25 | 4637 |
| <i>V. alginolyticus</i> | PV126 | 5128107 | 74  | 44.6  | 212144 | 94.22 | 4617 |
| <i>V. alginolyticus</i> | PV153 | 5096286 | 146 | 44.64 | 177533 | 90.51 | 4672 |
| <i>V. alginolyticus</i> | PV178 | 5146549 | 80  | 44.57 | 172036 | 91.04 | 4656 |
| <i>V. alginolyticus</i> | PV242 | 5298417 | 103 | 44.62 | 116907 | 88.53 | 4785 |
| <i>V. alginolyticus</i> | PV255 | 5108897 | 81  | 44.6  | 165308 | 92.19 | 4582 |
| <i>V. vulnificus</i>    | PV35  | 5002584 | 203 | 46.74 | 109370 | 83.59 | 4459 |
| <i>V. vulnificus</i>    | PV152 | 4768546 | 225 | 46.61 | 75474  | 80.95 | 4304 |
| <i>V. vulnificus</i>    | PV159 | 4821910 | 169 | 46.75 | 99144  | 83.74 | 4279 |
| <i>V. vulnificus</i>    | PV194 | 5107101 | 301 | 46.79 | 84019  | 59.31 | 4547 |
| <i>V. vulnificus</i>    | PV195 | 4897715 | 146 | 46.89 | 105901 | 54.7  | 4397 |
| <i>V. vulnificus</i>    | PV197 | 5103500 | 330 | 46.8  | 65195  | 80.73 | 4537 |
| <i>V. vulnificus</i>    | PV205 | 4883385 | 218 | 46.99 | 106918 | 55.96 | 4369 |

|                      |         |         |     |       |        |       |      |
|----------------------|---------|---------|-----|-------|--------|-------|------|
| <i>V. vulnificus</i> | PV206   | 5062232 | 217 | 46.84 | 89701  | 55.22 | 4570 |
| <i>V. vulnificus</i> | PV207   | 4974440 | 193 | 46.91 | 91250  | 55.5  | 4477 |
| <i>V. furnissii</i>  | PV10    | 5014480 | 75  | 50.4  | 172263 | 90.9  | 4646 |
| <i>V. furnissii</i>  | PV57    | 4930994 | 74  | 50.84 | 163279 | 90.61 | 4543 |
| <i>V. furnissii</i>  | PV88    | 4816633 | 69  | 50.82 | 167877 | 89.93 | 4442 |
| <i>V. furnissii</i>  | PV169_L | 4881141 | 79  | 50.63 | 223193 | 90.58 | 4493 |
| <i>V. furnissii</i>  | PV169_S | 4881141 | 79  | 50.63 | 223193 | 90.58 | 4493 |
| <i>V. furnissii</i>  | PV231   | 5226034 | 105 | 50.23 | 184803 | 90.57 | 4954 |
| <i>V. diabolicus</i> | PV89    | 5052288 | 56  | 44.84 | 226153 | 90.58 | 4568 |
| <i>V. diabolicus</i> | PV164   | 5159768 | 290 | 45.07 | 217868 | 89.63 | 4909 |
| <i>V. diabolicus</i> | PV269   | 5408210 | 491 | 44.91 | 100179 | 89.13 | 4992 |
| <i>V. diabolicus</i> | PV270   | 5135936 | 104 | 44.68 | 141052 | 88.98 | 4703 |

Supplementary Table S2. Sample information of the *Vibrio* spp. isolates analyzed in this study.

| <i>Vibrio</i> species      | Isolate ID | Sample features |                 |               |                   |                    |           | NCBI Biosample accession number |
|----------------------------|------------|-----------------|-----------------|---------------|-------------------|--------------------|-----------|---------------------------------|
|                            |            | Collection date | Location        | Sample type   | Source            | Virulence genes    | Reference |                                 |
| <i>V. parahaemolyticus</i> | PV1        | 27/04/2011      | Santa Marta     | Clinical      | Stool             | <i>tdh + trh</i> - | LSPD      | SAMN20804966                    |
| <i>V. parahaemolyticus</i> | PV11       | 05/09/2012      | Magdalena       | Environmental | Continental Water | <i>tdh - trh -</i> | LSPD      | SAMN20805030                    |
| <i>V. parahaemolyticus</i> | PV17       | 07/09/2018      | Choco           | Environmental | Continental Water | <i>tdh - trh -</i> | INVEMAR   | SAMN20805036                    |
| <i>V. parahaemolyticus</i> | PV32       | 17/09/2018      | ND              | Environmental | Continental Water | <i>tdh - trh -</i> | INVEMAR   | SAMN20805037                    |
| <i>V. parahaemolyticus</i> | PV53       | 30/07/2018      | Cordoba         | Clinical      | Stool             | <i>tdh + trh</i> - | LSPD      | SAMN20804969                    |
| <i>V. parahaemolyticus</i> | PV85       | 16/10/2017      | Cordoba         | Clinical      | Stool             | <i>tdh + trh</i> - | LSPD      | SAMN20804970                    |
| <i>V. parahaemolyticus</i> | PV109      | 07/09/2018      | Choco           | Environmental | Marine water      | <i>tdh - trh -</i> | INVEMAR   | SAMN20802061                    |
| <i>V. parahaemolyticus</i> | PV112      | 07/09/2018      | Choco           | Environmental | Marine water      | <i>tdh - trh -</i> | INVEMAR   | SAMN20805029                    |
| <i>V. parahaemolyticus</i> | PV156      | 22/04/2019      | Atlantico       | Environmental | Estuarine water   | <i>tdh - trh -</i> | INVEMAR   | SAMN20805031                    |
| <i>V. parahaemolyticus</i> | PV161      | 22/04/2019      | Atlantico       | Environmental | Continental Water | <i>tdh - trh -</i> | INVEMAR   | SAMN20805035                    |
| <i>V. parahaemolyticus</i> | PV170      | 06/05/2019      | Cordoba         | Clinical      | Stool             | <i>tdh + trh</i> - | LSPD      | SAMN20804964                    |
| <i>V. parahaemolyticus</i> | PV173      | 17/07/2019      | Cordoba         | Clinical      | ND                | <i>tdh + trh</i> - | LSPD      | SAMN20804965                    |
| <i>V. parahaemolyticus</i> | PV213      | 26/06/2019      | Valle del Cauca | Environmental | Estuarine water   | <i>tdh - trh -</i> | INVEMAR   | SAMN20805032                    |
| <i>V. parahaemolyticus</i> | PV221      | 22/04/2019      | Atlantico       | Environmental | Continental Water | <i>tdh - trh -</i> | INVEMAR   | SAMN20805033                    |
| <i>V. parahaemolyticus</i> | PV235      | 02/05/2019      | Nariño          | Environmental | Continental Water | <i>tdh - trh -</i> | INVEMAR   | SAMN20805034                    |
| <i>V. parahaemolyticus</i> | PV278      | 30/07/2019      | Bogota D.C.     | Clinical      | Stool             | <i>tdh + trh</i> - | LSPD      | SAMN20804967                    |
| <i>V. parahaemolyticus</i> | PV280      | 24/07/2019      | Cordoba         | Clinical      | Stool             | <i>tdh + trh</i> - | LSPD      | SAMN20804968                    |
| <i>V. fluvialis</i>        | PV3        | 08/12/2014      | Atlantico       | Environmental | Continental water | <i>vfh +</i>       | LSPD      | SAMN20805038                    |

|                         |       |            |            |               |                   |               |         |              |
|-------------------------|-------|------------|------------|---------------|-------------------|---------------|---------|--------------|
| <i>V. fluvialis</i>     | PV4   | 26/04/2011 | San Andres | Environmental | Water             | <i>vfh +</i>  | LSPD    | SAMN20805040 |
| <i>V. fluvialis</i>     | PV5   | 17/02/2011 | Cauca      | Environmental | Continental water | <i>vfh +</i>  | LSPD    | SAMN20805042 |
| <i>V. fluvialis</i>     | PV7   | 09/05/2011 | San Andres | Environmental | Continental water | <i>vfh +</i>  | LSPD    | SAMN20805046 |
| <i>V. fluvialis</i>     | PV8   | 02/02/2011 | ND         | ND            | ND                | <i>vfh +</i>  | LSPD    | SAMN20805047 |
| <i>V. fluvialis</i>     | PV9   | 14/04/2011 | Cauca      | Clinical      | Stool             | <i>vfh +</i>  | LSPD    | SAMN20804975 |
| <i>V. fluvialis</i>     | PV47  | 14/03/2018 | Magdalena  | Environmental | Marine water      | <i>vfh +</i>  | LSPD    | SAMN20805039 |
| <i>V. fluvialis</i>     | PV50  | 22/05/2018 | La Guajira | Clinical      | Stool             | <i>vfh +</i>  | LSPD    | SAMN20804974 |
| <i>V. fluvialis</i>     | PV59  | 18/11/2018 | Magdalena  | Environmental | Untreated water   | <i>vfh +</i>  | LSPD    | SAMN20805041 |
| <i>V. fluvialis</i>     | PV60  | 18/11/2018 | Magdalena  | Environmental | Untreated water   | <i>vfh +</i>  | LSPD    | SAMN20805043 |
| <i>V. fluvialis</i>     | PV75  | 29/06/2017 | San Andres | Environmental | Water             | <i>vfh +</i>  | LSPD    | SAMN20805044 |
| <i>V. fluvialis</i>     | PV76  | 05/07/2017 | Magdalena  | Environmental | Water             | <i>vfh +</i>  | LSPD    | SAMN20805045 |
| <i>V. fluvialis</i>     | PV92  | 09/05/2017 | Magdalena  | Environmental | Fresh water       | <i>vfh +</i>  | LSPD    | SAMN20805048 |
| <i>V. fluvialis</i>     | PV101 | 11/02/2016 | Nariño     | Clinical      | Stool             | <i>vfh +</i>  | LSPD    | SAMN20804971 |
| <i>V. fluvialis</i>     | PV105 | 31/10/2016 | San Andres | Clinical      | Stool             | <i>vfh +</i>  | LSPD    | SAMN20804972 |
| <i>V. fluvialis</i>     | PV131 | 03/04/2019 | Amazonas   | Clinical      | Stool             | <i>vfh +</i>  | LSPD    | SAMN20804973 |
| <i>V. alginolyticus</i> | PV82  | 10/10/2017 | Magdalena  | Environmental | Marine water      | <i>tdh -</i>  | LSPD    | SAMN20805049 |
| <i>V. alginolyticus</i> | PV116 | 07/09/2018 | Choco      | Environmental | Continental water | <i>tdh -</i>  | INVEMAR | SAMN20805050 |
| <i>V. alginolyticus</i> | PV118 | 27/08/2018 | Magdalena  | Environmental | Marine water      | <i>tdh -</i>  | INVEMAR | SAMN20805051 |
| <i>V. alginolyticus</i> | PV126 | 28/08/2018 | Magdalena  | Environmental | Marine water      | <i>tdh -</i>  | INVEMAR | SAMN20805052 |
| <i>V. alginolyticus</i> | PV153 | 23/04/2019 | Atlantico  | Environmental | Continental water | <i>tdh -</i>  | INVEMAR | SAMN20805053 |
| <i>V. alginolyticus</i> | PV178 | 22/04/2019 | Atlantico  | Environmental | Marine water      | <i>tdh -</i>  | INVEMAR | SAMN20805054 |
| <i>V. alginolyticus</i> | PV242 | 02/05/2019 | Nariño     | Environmental | Water             | <i>tdh -</i>  | INVEMAR | SAMN20805055 |
| <i>V. alginolyticus</i> | PV255 | 02/05/2019 | Nariño     | Environmental | Water             | <i>tdh -</i>  | INVEMAR | SAMN20805056 |
| <i>V. vulnificus</i>    | PV35  | 12/10/2018 | Santander  | Clinical      | Wound             | <i>vcgE +</i> | LSPD    | SAMN20804976 |
| <i>V. vulnificus</i>    | PV152 | 22/04/2019 | Atlantico  | Environmental | Estuarine water   | <i>vcgC +</i> | INVEMAR | SAMN20805057 |

|                      |         |            |                    |               |              |               |         |              |
|----------------------|---------|------------|--------------------|---------------|--------------|---------------|---------|--------------|
| <i>V. vulnificus</i> | PV159   | 22/04/2019 | Atlantico          | Environmental | Water        | <i>vcgE</i> + | INVEMAR | SAMN20805058 |
| <i>V. vulnificus</i> | PV194   | 26/06/2019 | Valle del Cauca    | Environmental | Water        | <i>vcgC</i> + | INVEMAR | SAMN20805059 |
| <i>V. vulnificus</i> | PV195   | 26/06/2019 | Valle del Cauca    | Environmental | Water        | <i>vcgC</i> + | INVEMAR | SAMN20805060 |
| <i>V. vulnificus</i> | PV197   | 26/06/2019 | Valle del Cauca    | Environmental | Water        | <i>vcgC</i> + | INVEMAR | SAMN20805064 |
| <i>V. vulnificus</i> | PV205   | 26/06/2019 | Valle del Cauca    | Environmental | Marine water | <i>vcgC</i> + | INVEMAR | SAMN20805061 |
| <i>V. vulnificus</i> | PV206   | 26/06/2019 | Valle del Cauca    | Environmental | Marine water | <i>vcgC</i> + | INVEMAR | SAMN20805062 |
| <i>V. vulnificus</i> | PV207   | 26/06/2019 | Valle del Cauca    | Environmental | Marine water | <i>vcgC</i> + | INVEMAR | SAMN20805063 |
| <i>V. furnissii</i>  | PV10    | 11/04/2011 | La Guajira         | Environmental | Water        | <i>vfh</i> +  | LSPD    | SAMN20805065 |
| <i>V. furnissii</i>  | PV57    | 22/09/2018 | Norte de Santander | Clinical      | Stool        | <i>vfh</i> +  | LSPD    | SAMN20804978 |
| <i>V. furnissii</i>  | PV88    | 09/11/2017 | Choco              | Clinical      | Stool        | <i>vfh</i> +  | LSPD    | SAMN20804979 |
| <i>V. furnissii</i>  | PV169_S | 07/06/2019 | Nariño             | Clinical      | Stool        | <i>vfh</i> +  | LSPD    | SAMN20931810 |
| <i>V. furnissii</i>  | PV169_L | 07/06/2019 | Nariño             | Clinical      | Stool        | <i>vfh</i> +  | LSPD    | SAMN20931810 |
| <i>V. furnissii</i>  | PV231   | 02/05/2019 | Nariño             | Environmental | Water        | <i>vfh</i> +  | INVEMAR | SAMN20805066 |
| <i>V. diabolicus</i> | PV164   | 22/04/2019 | Atlantico          | Environmental | Water        | <i>tdh</i> -  | INVEMAR | SAMN20805067 |
| <i>V. diabolicus</i> | PV269   | 28/05/2019 | Magdalena          | Environmental | Marine water | <i>tdh</i> -  | INVEMAR | SAMN20805068 |
| <i>V. diabolicus</i> | PV270   | 28/05/2019 | Magdalena          | Environmental | Marine water | <i>tdh</i> -  | INVEMAR | SAMN20805069 |
| <i>V. diabolicus</i> | PV89    | 12/12/2017 | Magdalena          | Environmental | Marine water | <i>tdh</i> -  | LSPD    | SAMN20805070 |

Reference: INVEMAR: José Benito Vives de Andréis Marine and Coastal Research Institute. LSPD: Laboratorio de Salud Pública - Secretaria Distrital de Salud de Bogota. The data were extracted from: Grupo de Microbiología, Instituto Nacional de Salud de Colombia, base de datos proyecto “*Vibrio* spp en reservorios de agua en Colombia, como agentes potenciales de cólera y vibriosis”. 2020. Datos no publicados

Supplementary Table S3. Reference *Vibrio* spp. genomes used for reference-guided de novo genome assemblies.

| <b>Vibrio species</b>          | <b>RefSeq accessions for chromosomes 1, 2 and plasmid, if present</b> | <b>GenBank assembly accession</b> |
|--------------------------------|-----------------------------------------------------------------------|-----------------------------------|
| <i>Vibrio parahaemolyticus</i> | NC_004603.1                                                           | GCA_000196095.1                   |
|                                | NC_004605.1                                                           |                                   |
| <i>Vibrio alginolyticus</i>    | NC_022349.1                                                           | GCF_000354175.2                   |
|                                | NC_022359.1                                                           |                                   |
| <i>Vibrio fluvialis</i>        | NZ_CP014034.2                                                         | GCF_001558415.2                   |
|                                | NZ_CP014035.2                                                         |                                   |
| <i>Vibrio vulnificus</i>       | NZ_CP014636.1                                                         | GCF_002215135.1                   |
|                                | NZ_CP014637.1                                                         |                                   |
|                                | NZ_CP014638.1 (plasmid)                                               |                                   |
| <i>Vibrio diabolis</i>         | NZ_CP042451.1                                                         | GCF_011801455.1                   |
|                                | NZ_CP042452.1                                                         |                                   |
| <i>Vibrio furnissii</i>        | NZ_CP040990.1                                                         | GCF_006364355.1                   |
|                                | NZ_CP040991.1                                                         |                                   |
|                                | NZ_CP040991.1 (plasmid)                                               |                                   |

Supplementary Table S4. MLST results of *Vibrio parahaemolyticus*.

| Isolate | ST   | <i>dnaE</i> | <i>gyrB</i> | <i>recA</i> | <i>dtdS</i> | <i>pntA</i> | <i>pyrC</i> | <i>tnaA</i> | source      | year | pubmlst_id |
|---------|------|-------------|-------------|-------------|-------------|-------------|-------------|-------------|-------------|------|------------|
| PV109   | 2486 | 155         | 475         | 242         | 407         | 206         | 11          | 24          | environment | 2018 | 3578       |
| PV11    | 2487 | 12          | 180         | 81          | 53          | 21          | 11          | 17          | environment | 2012 | 3579       |
| PV156   | 2508 | 406         | 90          | 410         | 353         | 26          | 295         | 9           | environment | 2019 | 3617       |
| PV161   | 2489 | 31          | 124         | 411         | 76          | 134         | 194         | 24          | environment | 2019 | 3625       |
| PV170   | 3    | 3           | 4           | 19          | 4           | 29          | 4           | 22          | clinical    | 2019 | 3618       |
| PV173   | 3    | 3           | 4           | 19          | 4           | 29          | 4           | 22          | clinical    | 2019 | 3619       |
| PV17    | -    | 10          | ~510        | 335         | ~330        | ~50         | 18          | ~33         | environment |      | UT         |
| PV1     | 120  | 60          | 108         | 86          | 98          | 18          | 45          | 51          | clinical    | 2011 | 3620       |
| PV213   | 2488 | 289         | 563         | 3           | 13          | 230         | 54          | 24          | environment | 2019 | 3580       |
| PV221   | 2489 | 31          | 124         | 411         | 76          | 134         | 194         | 24          | environment | 2019 | 3581       |
| PV235   | 2490 | 148         | 562         | 31          | 510         | 23          | 461         | 17          | environment | 2019 | 3582       |
| PV278   | 3    | 3           | 4           | 19          | 4           | 29          | 4           | 22          | clinical    | 2019 | 3621       |
| PV280   | 3    | 3           | 4           | 19          | 4           | 29          | 4           | 22          | clinical    | 2019 | 3622       |
| PV32    | 2491 | 416         | 104         | 67          | 251         | 219         | 206         | 24          | environment | 2018 | 3583       |
| PV53    | 3    | 3           | 4           | 19          | 4           | 29          | 4           | 22          | clinical    | 2018 | 3623       |
| PV85    | 3    | 3           | 4           | 19          | 4           | 29          | 4           | 22          | clinical    | 2017 | 3624       |
| PV112   | -    | 10          | ~510        | 335         | ~330        | ~50         | 18          | ~33         | environment |      | UT         |

Supplementary Table S5. MLST results of *Vibrio vulnificus*.

| Isolate | ST  | <i>glp</i> | <i>gyrB</i> | <i>mdh</i> | <i>metG</i> | <i>purM</i> | <i>dtdS</i> | <i>lysA</i> | <i>pntA</i> | <i>pyrC</i> | <i>tnaA</i> | source     | year | pubmlst_id |
|---------|-----|------------|-------------|------------|-------------|-------------|-------------|-------------|-------------|-------------|-------------|------------|------|------------|
| PV152   | 571 | 104        | 42          | 95         | 103         | 23          | 193         | 101         | 25          | 106         | 18          | enviroment | 2019 | 776        |
| PV159   | 572 | 138        | 14          | 11         | 9           | 8           | 194         | 184         | 113         | 11          | 22          | enviroment | 2019 | 777        |
| PV194   | 598 | 5          | 30          | 8          | 1           | 1           | 8           | 9           | 1           | 10          | 7           | enviroment | 2019 | 806        |
| PV195   | 599 | 3          | 112         | 3          | 25          | 91          | 26          | 2           | 1           | 29          | 7           | enviroment | 2019 | 804        |
| PV197   | 573 | 139        | 113         | 6          | 105         | 4           | 195         | 185         | 114         | 142         | 127         | enviroment | 2019 | 778        |
| PV205   | 600 | 35         | 1           | 121        | 1           | 26          | 39          | 35          | 39          | 141         | 13          | enviroment | 2019 | 805        |
| PV206   | 601 | 100        | 3           | 120        | 10          | 53          | 143         | 141         | 10          | 140         | 91          | enviroment | 2019 | 806        |
| PV207   | 335 | 22         | 3           | 22         | 19          | 20          | 29          | 2           | 36          | 3           | 7           | enviroment | 2019 | 807        |
| PV35    | 574 | 80         | 77          | 2          | 104         | 8           | 22          | 12          | 5           | 12          | 45          | clinical   | 2018 | 779        |
